# Supplementary material
Source: ML conference proceedings conference paper supplement (https://openreview.net/forum?id=DNhuns_6dR)
Supplement: supplementary_material [file attachment]

---

# Mitigating Transformer Overconfidence via Lipschitz Regularization (Supplementary Material)

---

Wenqian Ye<sup>1,4</sup>

Yunsheng Ma<sup>2,4</sup>

Xu Cao<sup>3,4</sup>

Kun Tang<sup>5</sup>

<sup>1</sup>Department of Computer Science, University of Virginia, Charlottesville, VA, USA

<sup>2</sup>College of Engineering, Purdue University, West Lafayette, IN, USA

<sup>3</sup>Department of Computer Science, University of Illinois Urbana-Champaign, Urbana, IL, USA

<sup>4</sup>AI Lab, Shenzhen Children's Hospital, Shenzhen, China

<sup>5</sup>T Lab, Tencent, Beijing, China

## A PROOF FOR THE LIPSCHITZ CONSTANT OF LAYERNORM

The LayerNorm operation [Ba et al., 2016] used in LRFormer can be expressed as:

$$\text{LN}(\mathbf{x}) = \frac{\mathbf{x} - \mu(\mathbf{x})}{\sqrt{\sigma^2(\mathbf{x}) + \epsilon}} * \gamma + \beta$$

where  $\mathbf{x}, \beta, \gamma \in \mathbb{R}^N$ ,  $\mu(\mathbf{x}) = \frac{1}{N} \sum_{i=1}^N x_i$ ,  $\sigma^2(\mathbf{x}) = \frac{1}{N} \sum_{i=1}^N (x_i - \mu(\mathbf{x}))^2$ .

WLOG, assume  $N > 2$  and not all  $x_i$  are equal.

The derivatives of  $\mu$  and  $\sigma^2$  w.r.t  $x$ :

$$\begin{aligned} \frac{\partial \mu}{\partial \mathbf{x}} &= \frac{1}{N} \mathbf{1}^\top \\ \frac{\partial \sigma^2}{\partial \mathbf{x}} &= \frac{2}{N} (\mathbf{x} - \mu)^\top \end{aligned}$$

Take the derivative of  $\text{LN}(\mathbf{x})_i$ , the  $i$ th element of  $\text{LN}(\mathbf{x})$ , with respect to  $\mathbf{x}$  is:

$$\frac{\partial \text{LN}(\mathbf{x})_i}{\partial \mathbf{x}} = \gamma_i (\sigma^2 + \epsilon)^{-\frac{1}{2}} \left[ (\mathbf{e}_i - \frac{1}{N} \mathbf{1})^\top - \frac{1}{N} (\sigma^2 + \epsilon)^{-1} (x_i - \mu) (\mathbf{x} - \mu)^\top \right]. \quad (1)$$

where  $\mathbf{e}_i \in \mathbb{R}^N$  is a one-hot vector with 1 at the  $i$ th element. Therefore,

$$\begin{aligned} \frac{\partial \text{LN}(\mathbf{x})}{\partial \mathbf{x}} &= (\sigma^2 + \epsilon)^{-\frac{1}{2}} \left[ \text{diag}(\gamma) - \frac{1}{N} \gamma \mathbf{1}^\top - \frac{1}{N} (\sigma^2 + \epsilon)^{-1} \text{diag}(\gamma) (\mathbf{x} - \mu) (\mathbf{x} - \mu)^\top \right], \\ \left\| \text{diag}(\gamma) - \frac{1}{N} \gamma \mathbf{1}^\top \right\|_\infty &= \frac{2(N-1)}{N} \max_i |\gamma_i|, \end{aligned} \quad (2)$$

Take the infinity-norm on both sides, we have:

$$\begin{aligned} \left\| \frac{\partial \text{LN}(\mathbf{x})}{\partial \mathbf{x}} \right\|_\infty &= (\sigma^2 + \epsilon)^{-\frac{1}{2}} \left\| \text{diag}(\gamma) - \frac{1}{N} \gamma \mathbf{1}^\top - \frac{1}{N} (\sigma^2 + \epsilon)^{-1} \text{diag}(\gamma) (\mathbf{x} - \mu) (\mathbf{x} - \mu)^\top \right\|_\infty \\ &\leq \epsilon^{-\frac{1}{2}} \left( \frac{2(N-1)}{N} \max_i |\gamma_i| + \frac{1}{N} \max_i |\gamma_i| N(N-2) \right) \\ &\leq \epsilon^{-\frac{1}{2}} \max_i |\gamma_i| N. \end{aligned}$$

## B PROOF FOR THE LIPSCHITZ CONSTANT OF LRSA

The pair-wise LRSA function is expressed as:

$$S_{ij} = -\frac{\alpha \|x_i^\top W_Q - x_j^\top W_K\|_2^2}{\|Q\|_F \|X^\top\|_{(\infty,2)}} \quad (3)$$

$$P_i = S_i(X)$$

$$P_{ij} = \frac{e^{S_{ij}}}{\sum_{t=1}^n e^{S_{it}}} \leq 1$$

To take the derivative  $P_{ij}$ , there are two cases.

When  $t = j$ :

$$\begin{aligned} \frac{\partial P_{ij}}{\partial S_{it}} &= \frac{\partial P_{ij}}{\partial S_{ij}} = \frac{\partial}{\partial S_{ij}} \left( \frac{e^{S_{ij}}}{\sum_{t=1}^n e^{S_{it}}} \right) = \frac{e^{S_{ij}} (\sum_{t=1}^n e^{S_{it}}) - (e^{S_{ij}})^2}{(\sum_{t=1}^n e^{S_{it}})^2} \\ &= \frac{e^{S_{ij}}}{\sum_{t=1}^n e^{S_{it}}} \left( 1 - \frac{e^{S_{ij}}}{\sum_{t=1}^n e^{S_{it}}} \right) = P_{ij}(1 - P_{ij}) \end{aligned} \quad (4)$$

When  $t \neq j$ :

$$\begin{aligned} \frac{\partial P_{ij}}{\partial S_{it}} &= \frac{\partial}{\partial S_{it}} \left( \frac{e^{S_{ij}}}{\sum_{t=1}^n e^{S_{it}}} \right) = -\frac{e^{S_{ij}}}{\sum_{t=1}^n e^{S_{it}}} \frac{e^{S_{it}}}{\sum_{t=1}^n e^{S_{it}}} = -P_{ij}P_{it} \\ \frac{\partial P_{ij}}{\partial x_k} &= \sum_{t=1}^n \frac{\partial P_{ij}}{\partial S_{it}} \frac{\partial S_{it}}{\partial x_k} = P_{ij}(1 - P_{ij}) \frac{\partial S_{ij}}{\partial x_k} - \sum_{t=1, t \neq j}^n P_{ij}P_{it} \frac{\partial S_{it}}{\partial x_k} = P_{ij} \frac{\partial S_{ij}}{\partial x_k} - P_{ij} \sum_{t=1}^n P_{it} \frac{\partial S_{it}}{\partial x_k} \end{aligned} \quad (5)$$

Take the infinity-norm on  $S_{it}$ , we get:

$$\begin{aligned} \left\| \frac{\partial S_{it}}{\partial x_k} \right\|_\infty &= \left\| \frac{\partial}{\partial x_k} \left( -\frac{\alpha \|x_i^\top W_Q - x_j^\top W_K\|_2^2}{\|Q\|_F \|X^\top\|_{(\infty,2)}} \right) \right\|_\infty \\ &= \left\| -\frac{2\alpha \|x_i^\top W_Q - x_j^\top W_K\|_2}{\|Q\|_F \|X^\top\|_{(\infty,2)}} \frac{\partial \|x_i^\top W_Q - x_j^\top W_K\|_2}{\partial x_k} + \frac{\alpha \|x_i^\top W_Q - x_j^\top W_K\|_2^2}{\|Q\|_F \|X^\top\|_{(\infty,2)}^2} \frac{\partial \|X^\top\|_{(\infty,2)}}{\partial x_k} \right\|_\infty \\ &\leq \left\| \frac{2\alpha \|x_i^\top W_Q - x_j^\top W_K\|_2}{\|Q\|_F \|X^\top\|_{(\infty,2)}} \frac{\partial \|x_i^\top W_Q - x_j^\top W_K\|_2}{\partial x_k} \right\|_\infty + \left\| \frac{\alpha \|x_i^\top W_Q - x_j^\top W_K\|_2^2}{\|Q\|_F \|X^\top\|_{(\infty,2)}^2} \frac{\partial \|X^\top\|_{(\infty,2)}}{\partial x_k} \right\|_\infty \\ &\leq \frac{2\alpha}{\|Q\|_F} \frac{\|x_i^\top W_Q\|_2 + \|x_j^\top W_K\|_2}{\|X^\top\|_{(\infty,2)}} \left( \frac{\partial \|x_i^\top W_Q\|_2}{\partial x_k} + \frac{\partial \|x_j^\top W_K\|_2}{\partial x_k} \right) + \frac{\alpha}{\|Q\|_F} \left( \frac{\|x_i^\top W_Q\|_2 + \|x_j^\top W_K\|_2}{\|X^\top\|_{(\infty,2)}} \right)^2 \\ &\leq \frac{2\alpha(\|W_Q\|_2 + \|W_K\|_2)^2}{\|Q\|_F} + \frac{\alpha(\|W_Q\|_2 + \|W_K\|_2)^2}{\|Q\|_F} \\ &= \frac{3\alpha(\|W_Q\|_2 + \|W_K\|_2)^2}{\|Q\|_F} \end{aligned}$$

Thus,

$$\begin{aligned} \left\| \frac{\partial P_{ij}}{\partial x_k} \right\|_\infty &= \left\| P_{ij} \frac{\partial S_{ij}}{\partial x_k} - P_{ij} \sum_{t=1}^n P_{it} \frac{\partial S_{it}}{\partial x_k} \right\|_\infty \leq P_{ij} \frac{3\alpha(\|W_Q\|_2 + \|W_K\|_2)^2}{\|Q\|_F} + P_{ij} \sum_{t=1}^n P_{it} \frac{3\alpha(\|W_Q\|_2 + \|W_K\|_2)^2}{\|Q\|_F} \\ &\leq \frac{6\alpha(\|W_Q\|_2 + \|W_K\|_2)^2}{\|Q\|_F} \leq \frac{6\alpha}{\|X\|_F} \cdot \frac{(\|W_Q\|_2 + \|W_K\|_2)^2}{\|W_Q\|_F} \end{aligned}$$

## C GAUSSIAN PROCESS LAYER

As an optional module in LRFormer, Gaussian Process (GP) with an RBF kernel following SNGP [Liu et al., 2020] is capable of perserving the distance awareness between input test sample and previously seen training data. This approach makes sure the model returns a uniform distribution over output labels when the input sample is OOD.

To make it end-to-end trainable, the Gaussian Process layer can be implemented a two-layer network:

$$\text{logits}(x) = \Phi(x)\beta, \quad \Phi(x) = \sqrt{\frac{2}{M}} * \cos(Wx + b) \quad (6)$$

Here,  $x$  is the input, and  $W$  and  $b$  are frozen weights initialized randomly from Gaussian and uniform distributions, respectively.  $\Phi(x)$  is Random Fourier Features (RFF) [Williams and Rasmussen, 2006].  $\beta$  is the learnable kernel weight similar to that of a Dense layer. The layer outputs the class prediction  $\text{logits}(x) \in \mathbb{R}_{\text{NumClasses}}$ .

## D EXPERIMENTAL DETAILS

In Table 1, we provide the training details used for reproducing the main results in Tables above. The  $Depth = 12$  (pretraining) is the experimental setup of the ImageNet1K dataset pretraining. The other hyperparameters follows the same setting from DeiT III [Touvron et al., 2022].

Table 1: Hyperparameters for LRFormer Training.

| Hyperparameters         | $Depth = 6$      | $Depth = 12$     | $Depth = 12$ (pretraining) |
|-------------------------|------------------|------------------|----------------------------|
| Layer depth             | 6                | 12               | 12                         |
| Input size              | $224 \times 224$ | $224 \times 224$ | $224 \times 224$           |
| Batch size              | 128              | 32               | 32                         |
| Warm-up steps           | 5                | 5                | 5                          |
| Optimizer               | SGD              | AdamW            | AdamW                      |
| Learning rate           | 0.01             | 0.006            | 0.004                      |
| Weight decay            | 0.05             | 0.05             | 0.05                       |
| Learning rate scheduler | cosine           | cosine           | cosine                     |
| Training epochs         | 100              | 100              | 100                        |

## References

- Jimmy Lei Ba, Jamie Ryan Kiros, and Geoffrey E Hinton. Layer normalization. *arXiv preprint arXiv:1607.06450*, 2016.
- Jeremiah Zhe Liu, Zi Lin, Shreyas Padhy, Dustin Tran, Tania Bedrax-Weiss, and Balaji Lakshminarayanan. Simple and principled uncertainty estimation with deterministic deep learning via distance awareness. *ArXiv*, abs/2006.10108, 2020.
- Hugo Touvron, Matthieu Cord, Alaaeldin El-Nouby, Jakob Verbeek, and Herv'e J'egou. Three things everyone should know about vision transformers. *ArXiv*, abs/2203.09795, 2022.
- Christopher K Williams and Carl Edward Rasmussen. *Gaussian processes for machine learning*, volume 2. MIT press Cambridge, MA, 2006.
